# Supplementary material for: Validity of mobile electronic data capture in clinical studies: a pilot study in a pediatric population
Source: Springer Nature journal article supplement (doi:10.1186/s12874-017-0438-x), 2017-12-01
Supplement: MOESM2 [file 15290518]

**Table 1. Timing of complete data and samples, by timepoint and location**

| Location  | Item             | Total n | Timing correct |      |      |       |
|-----------|------------------|---------|----------------|------|------|-------|
|           |                  |         | No             |      | Yes  |       |
|           |                  |         | n              | %    | n    | %     |
| At home   | Pain scale tM    | 47      | 0              | 0.0  | 47   | 100.0 |
|           | Pain scale t1    | 47      | 18             | 38.3 | 29   | 61.7  |
|           | Saliva sample t1 | 41      | 16             | 39.0 | 25   | 61.0  |
|           | Pain scale t2    | 47      | 13             | 27.7 | 34   | 72.3  |
|           | Saliva sample t2 | 38      | 6              | 15.8 | 32   | 84.2  |
|           | All              | 220     | 53             | 24.1 | 167  | 75.9  |
| Inpatient | Pain scale tM    | 47      | 0              | 0.0  | 47   | 100.0 |
|           | Pain scale t1    | 47      | 27             | 57.4 | 20   | 42.6  |
|           | Saliva sample t1 | 38      | 20             | 52.6 | 18   | 47.4  |
|           | Pain scale t2    | 47      | 21             | 44.7 | 26   | 55.3  |
|           | Saliva sample t2 | 39      | 17             | 43.6 | 22   | 56.4  |
|           | All              | 218     | 85             | 39.0 | 133  | 61.0  |
| All       | Pain scale tM    | 94      | 0              | 0.0  | 94   | 100.0 |
|           | Pain scale t1    | 94      | 45             | 47.9 | 49   | 52.1  |
|           | Saliva sample t1 | 79      | 36             | 45.6 | 43   | 54.4  |
|           | Pain scale t2    | 94      | 34             | 36.2 | 60   | 63.8  |
|           | Saliva sample t2 | 77      | 23             | 29.9 | 54   | 70.1  |
| All       | 438              | 138     | 31.5           | 300  | 68.5 |       |

**Table 2. Complete and correct data and samples when timing as a correctness factor is neglected (i.e. all data collected within one calendar day are correct)**

| Location  | Item          | Total n | Complete and correct |      |     |      |
|-----------|---------------|---------|----------------------|------|-----|------|
|           |               |         | No                   |      | Yes |      |
|           |               |         | n                    | %    | n   | %    |
| At home   | Pain scale    | 153     | 12                   | 7.8  | 141 | 92.2 |
|           | Saliva sample | 102     | 26                   | 25.5 | 76  | 74.5 |
|           | All           | 255     | 38                   | 14.9 | 217 | 85.1 |
| Inpatient | Pain scale    | 150     | 9                    | 6.0  | 141 | 94.0 |
|           | Saliva sample | 100     | 27                   | 27.0 | 73  | 73.0 |
|           | All           | 250     | 36                   | 14.4 | 214 | 85.6 |
| All       | pain scale    | 303     | 21                   | 6.9  | 282 | 93.1 |
|           | Saliva sample | 202     | 53                   | 26.2 | 149 | 73.8 |
|           | All           | 505     | 74                   | 14.7 | 431 | 85.3 |

**Table 3. Caregiver feasibility questionnaire**

|                                                                              | n  | %    |
|------------------------------------------------------------------------------|----|------|
| What statement(s) apply in your opinion? (n=15)                              |    |      |
| I think clinical studies at home are a good idea                             | 9  | 60.0 |
| I don't think clinical studies at home are a good idea                       | 1  | 6.7  |
| I am not sure                                                                | 5  | 33.3 |
| How were the aims of the study explained to you? (n=15)                      |    |      |
| Very well                                                                    | 9  | 60.0 |
| Well                                                                         | 5  | 33.3 |
| Sufficiently                                                                 | 1  | 6.7  |
| Not well                                                                     | 0  | 0.0  |
| Not well at all                                                              | 0  | 0.0  |
| How were your tasks during the conduct of the study explained to you? (n=15) |    |      |
| Very well                                                                    | 4  | 26.7 |
| Well                                                                         | 8  | 53.3 |
| Sufficiently                                                                 | 3  | 20.0 |
| Not well                                                                     | 0  | 0.0  |
| Not well at all                                                              | 0  | 0.0  |
| How user-friendly do you rate the mobile application? (n=15)                 |    |      |
| Great                                                                        | 6  | 40.0 |
| Ok                                                                           | 8  | 53.3 |
| Unusable                                                                     | 1  | 6.7  |
| Who has mainly collected data and samples in the hospital? (n=16)            |    |      |
| Mother                                                                       | 9  | 56.2 |
| Father                                                                       | 1  | 6.2  |
| Both parents                                                                 | 3  | 18.8 |
| Study Nurse                                                                  | 3  | 18.8 |
| Child                                                                        | 0  | 0.0  |
| Other                                                                        | 0  | 0.0  |
| Who has mainly collected data and samples in at home? (n=15)                 |    |      |
| Mother                                                                       | 11 | 73.3 |
| Father                                                                       | 1  | 6.7  |
| Both parents                                                                 | 3  | 20.0 |
| Study Nurse                                                                  | 0  | 0.0  |
| Child                                                                        | 0  | 0.0  |
| Other                                                                        | 0  | 0.0  |
| How feasible were the study procedures for you in the hospital? (ntot=15)    |    |      |
| Very easy                                                                    | 4  | 26.6 |
| Easy                                                                         | 10 | 66.7 |
| Difficult                                                                    | 1  | 6.7  |
| Very difficult                                                               | 0  | 0.0  |
| How feasible were the study procedures for you at home? (n=15)               |    |      |
| Very easy                                                                    | 2  | 13.3 |

|                                                                             |                      |    |      |
|-----------------------------------------------------------------------------|----------------------|----|------|
|                                                                             | Easy                 | 6  | 40.0 |
|                                                                             | Difficult            | 7  | 46.7 |
|                                                                             | Very difficult       | 0  | 0.0  |
| How feasible was taking photos of concomitant medication for you?<br>(n=15) |                      |    |      |
|                                                                             | Not used             | 4  | 26.7 |
|                                                                             | Very easy            | 4  | 26.7 |
|                                                                             | Easy                 | 5  | 33.2 |
|                                                                             | Difficult            | 1  | 6.7  |
|                                                                             | Very difficult       | 1  | 6.7  |
| How much time did you spend on study procedures per day? (n=15)             |                      |    |      |
|                                                                             | Less than 15 minutes | 10 | 66.7 |
|                                                                             | 15-30 min            | 4  | 26.6 |
|                                                                             | 30-45 min            | 1  | 6.7  |
|                                                                             | 45-60 min            | 0  | 0.0  |
|                                                                             | more than 60min      | 0  | 0.0  |
| Would you take part again in such a study? (n=15)                           |                      |    |      |
|                                                                             | Yes, for sure        | 4  | 26.7 |
|                                                                             | Probably yes         | 8  | 53.3 |
|                                                                             | Probably not         | 3  | 18.8 |
|                                                                             | Definitely not       | 0  | 0.0  |

**Table 4. Main difficulties experienced by caregivers during conduct of study**

| What were the main difficulties you experienced during the conduct of the study?<br>(multiple choice) |          |          |
|-------------------------------------------------------------------------------------------------------|----------|----------|
|                                                                                                       | <b>n</b> | <b>%</b> |
| It was sometimes difficult to follow the study procedures (i.e. timing of data collection)            | 13       | 86.7     |
| There were technical issues with the mobile application                                               | 3        | 20.0     |
| My child did not want to participate, i.e. provide saliva samples                                     | 3        | 20.0     |
| I was not able to contact the study personnel                                                         | 2        | 13.3     |
| It took too much time to follow the study procedures                                                  | 1        | 6.7      |
| I did not experience any difficulties                                                                 | 1        | 6.7      |
| Other                                                                                                 | 3        | 20.0     |
