# Supplementary material for: Validity of mobile electronic data capture in clinical studies: a pilot study in a pediatric population
Source: Springer Nature journal article supplement (doi:10.1186/s12874-017-0438-x), 2017-12-01

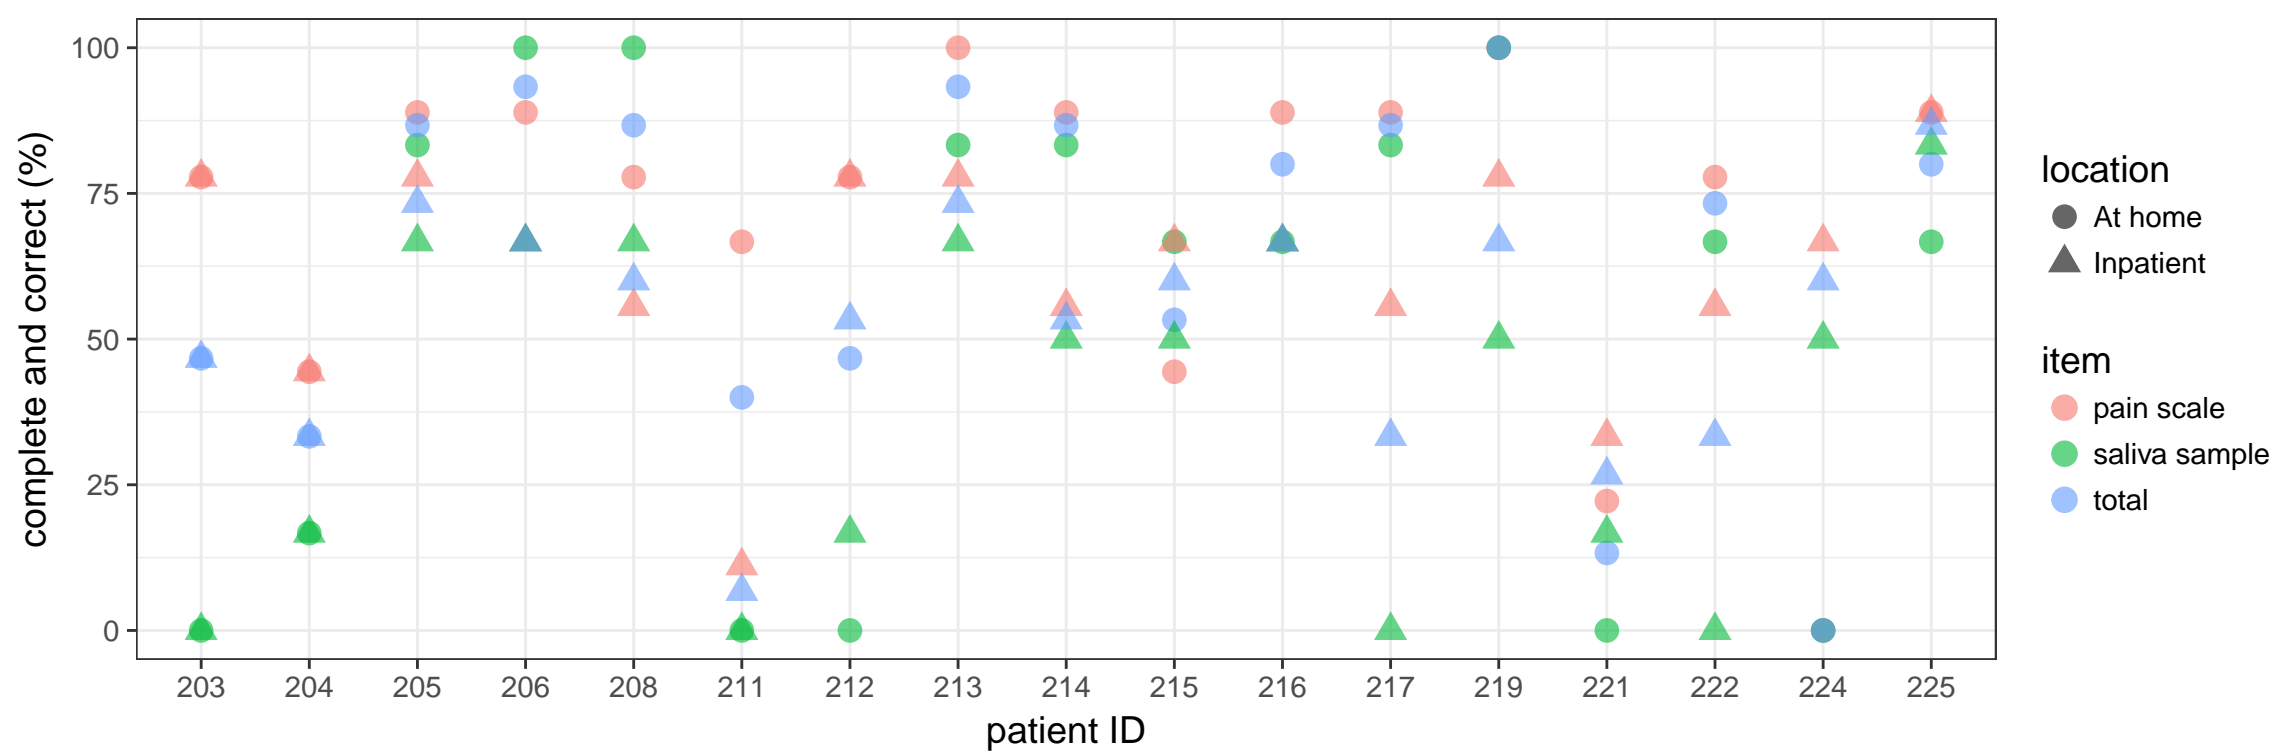

Supplement: MOESM4 [file 15290518]
